# Supplementary material for: The latent reservoir of inducible, infectious HIV-1 does not decrease despite decades of antiretroviral therapy
Source: PubMed Central journal article supplement (PMC10471168; doi:10.1172/jci171554), 2023-09-01
Supplement: jci-133-171554-s007.pdf [file jci-133-171554-s007.pdf]

Supplementary Information for:

## The latent reservoir of inducible, infectious HIV-1 does not decrease despite decades of antiretroviral therapy

Natalie F. McMyn<sup>1</sup>, Joseph Varriale<sup>1</sup>, Emily J. Fray<sup>1</sup>, Carolin Zitzmann<sup>2</sup>, Hannah MacLeod<sup>3</sup>, Jun Lai<sup>1</sup>, Anushka Singhal<sup>1</sup>, Milica Moskovljevic<sup>1</sup>, Mauro A. Garcia<sup>1</sup>, Brianna M. Lopez<sup>1</sup>, Vivek Hariharan<sup>1</sup>, Kyle Rhodehouse<sup>1</sup>, Kenneth Lynn<sup>4,5</sup>, Pablo Tebas<sup>5</sup>, Karam Mounzer<sup>6</sup>, Luis J. Montaner<sup>4</sup>, Erika Benko<sup>7</sup>, Colin Kovacs<sup>7</sup>, Rebecca Hoh<sup>8</sup>, Francesco R. Simonetti<sup>1</sup>, Gregory M. Laird<sup>3</sup>, Steven G. Deeks<sup>8</sup>, Ruy M. Ribeiro<sup>2</sup>, Alan S. Perelson<sup>2</sup>, Robert F. Siliciano<sup>1,9</sup>, and Janet M. Siliciano<sup>1,\*</sup>

### Figures

Figure S1. Plasma HIV-1 RNA levels and CD4<sup>+</sup> T counts of participants R1-R15

Figure S2. Plasma HIV-1 RNA levels and CD4<sup>+</sup> T counts of participants R16-30

Figure S3. Plasma HIV-1 RNA levels and CD4<sup>+</sup> T counts of participants R31-R42

Figure S4. Correlation between reservoir assays

Figure S5. Fits to the QVOA data using a linear, segmented exponential and biexponential models

Figure S6. Participant-specific clustering of *env* sequences

Figure S7. Large expanded clones dominate the population of persistent proviruses

Figure S8. Near full-length sequences of proviruses from PWH on very long-term ART

### Tables

Table S1. Characteristics of study participants

Table S2. Changes in drug regimens during suppressive ART

Table S3. Blips during suppressive ART

Table S4. Decay of cells with inducible, replication-competent proviruses as measured by QVOA

Table S5. Models for decay of inducible, replication-competent HIV-1 with very long-term ART

Table S6. Best fit models for decay of intact proviruses as measured by IPDA

Table S7. Best fit models for decay of defective proviruses as measured by IPDA

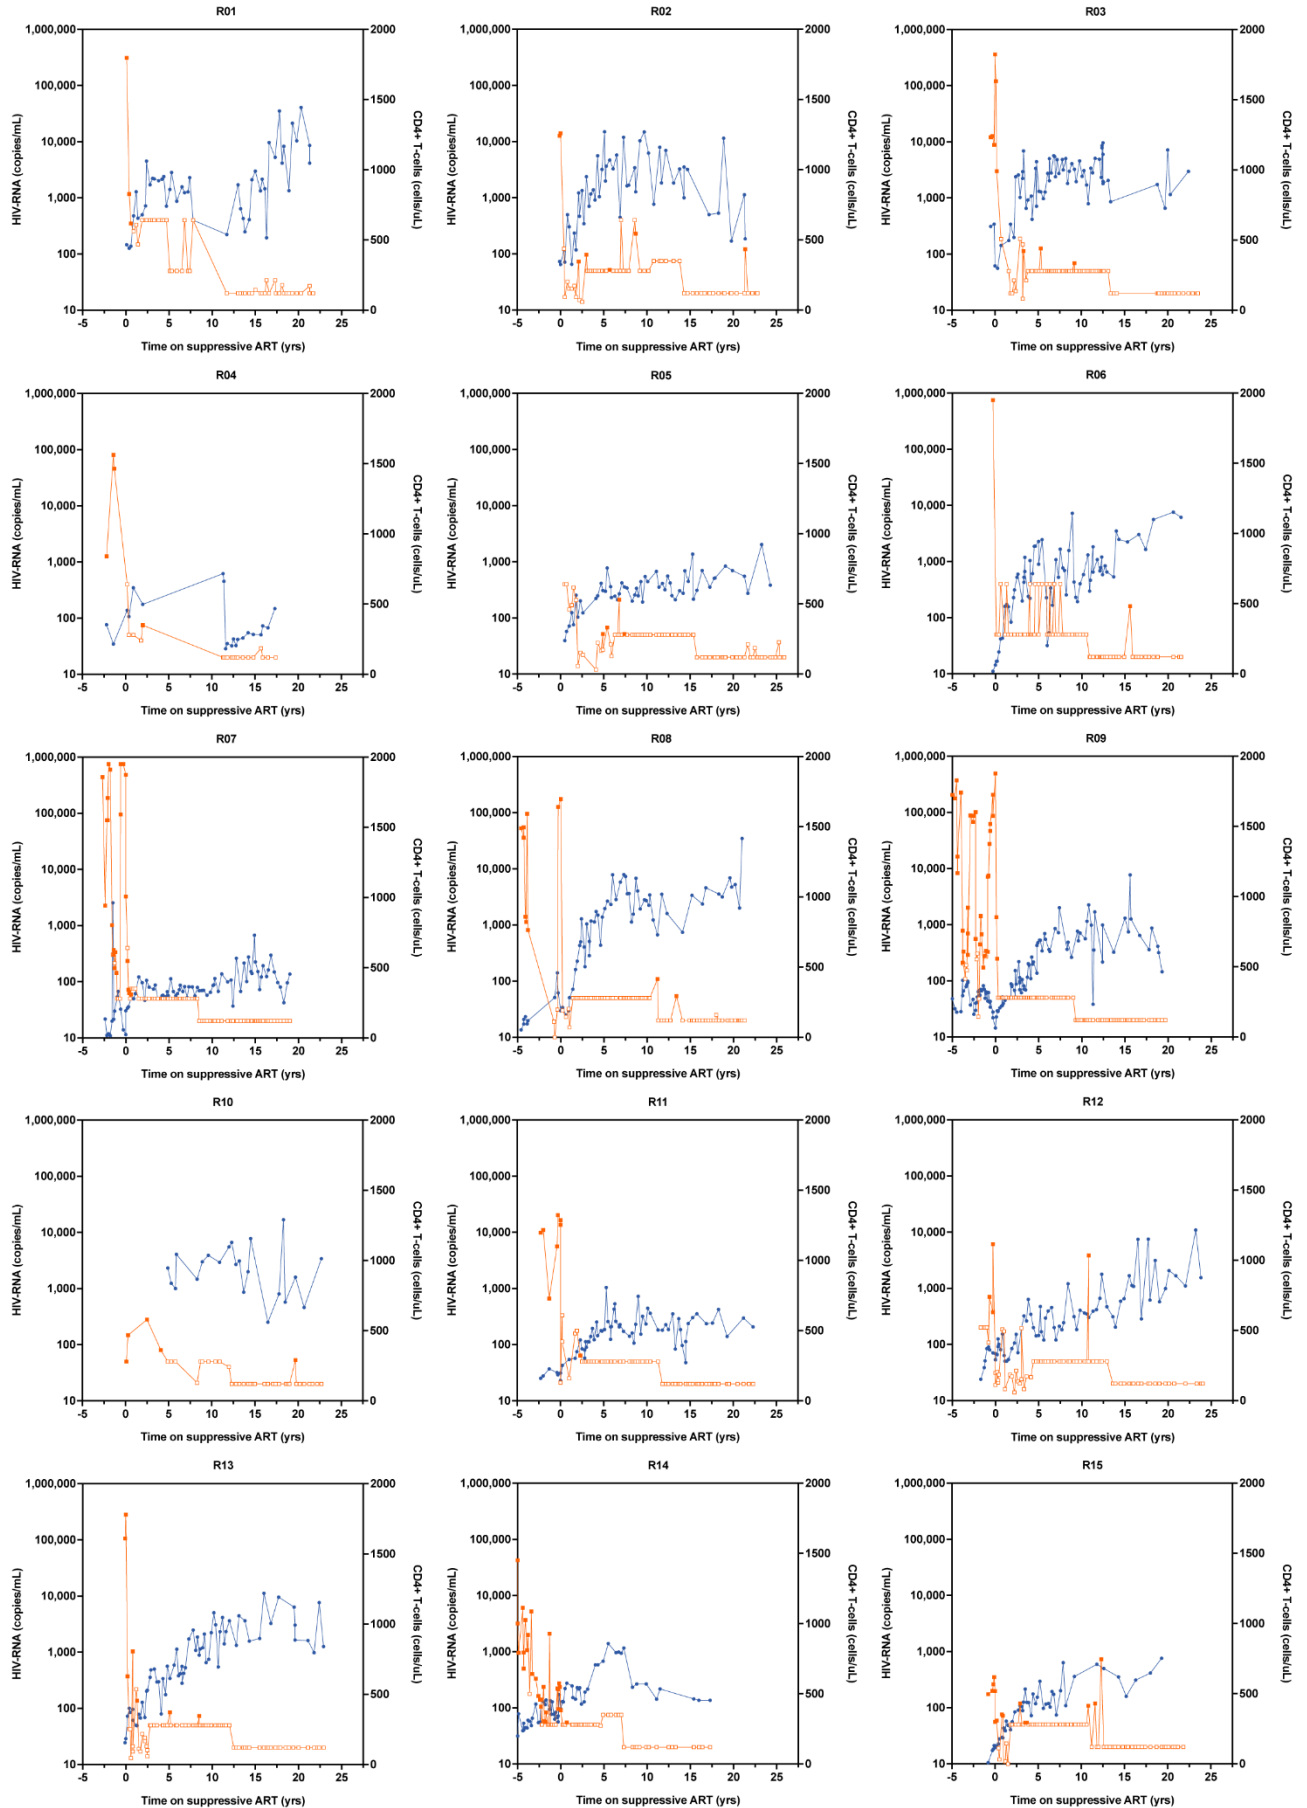

**Figure S1.** Plasma HIV-1 RNA levels and CD4<sup>+</sup> T counts of participants R01-R15. Levels of plasma HIV-1 RNA in copies/ml (solid orange squares) and CD4<sup>+</sup> T cells in cells/ $\mu$ l (blue circles) are plotted as a function of time on suppressive ART. Plasma HIV-1 RNA values below the limit of detection are denoted using open orange squares and plotted at the limit of detection of the assay used. Fluctuations in plasma HIV-1 RNA levels prior to initiation of suppressive ART mostly reflect regimen changes. Fluctuations after initiation of suppressive ART largely reflect differences in the limit of detection of the assay used. The limit of detection for most assays was 50 copies/ml or 20 copies/ml. ART regimens for each participant are listed in **Table S2**.

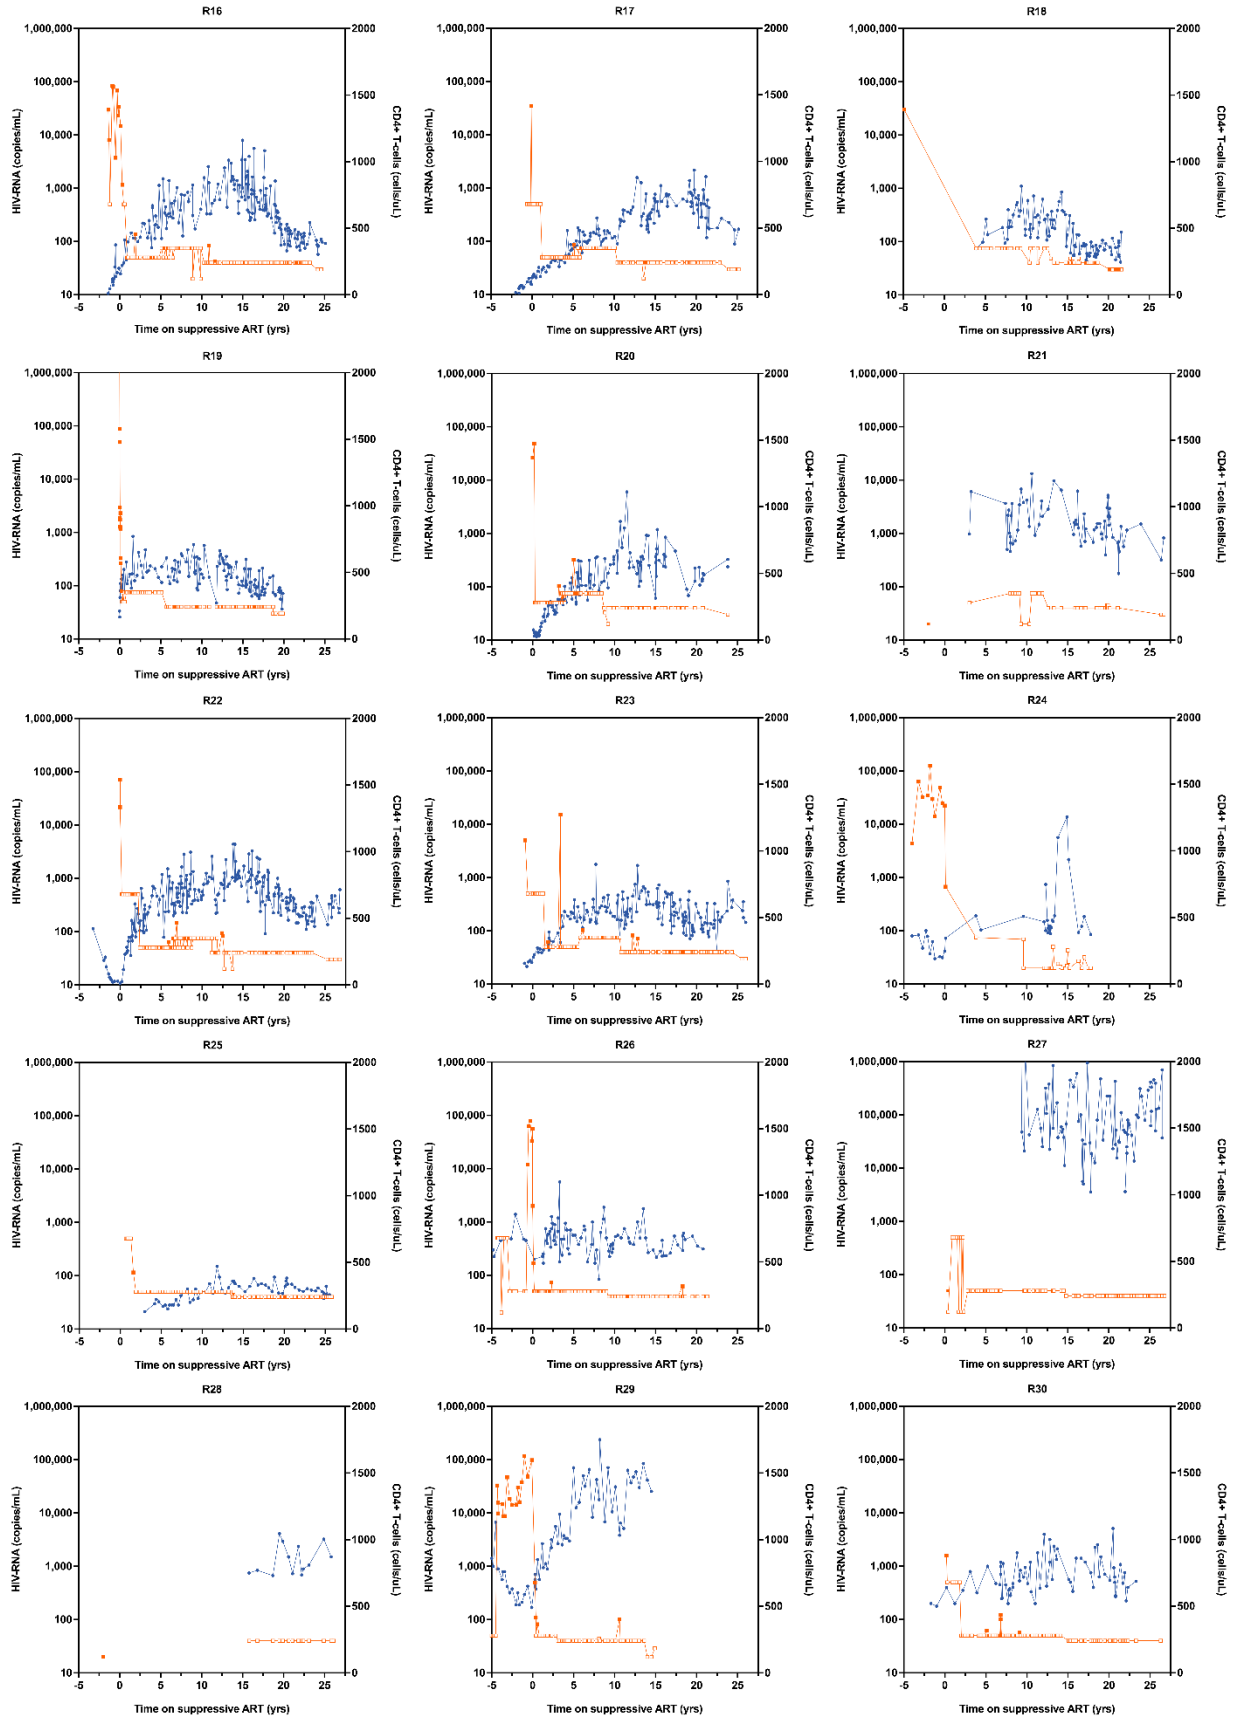

**Figure S2.** Plasma HIV-1 RNA levels and CD4<sup>+</sup> T counts of participants R16-R30. Levels of plasma HIV-1 RNA in copies/ml (solid orange squares) and CD4<sup>+</sup> T cells in cells/ $\mu$ l (blue circles) are plotted as a function of time on suppressive ART. Plasma HIV-1 RNA values below the limit of detection are denoted using open orange squares and plotted at the limit of detection of the assay used. Fluctuations in plasma HIV-1 RNA levels prior to initiation of suppressive ART mostly reflect regimen changes. Fluctuations after initiation of suppressive ART largely reflect differences in the limit of detection of the assay used. The limit of detection for most assays was 50 copies/ml or 20 copies/ml. ART regimens for each participant are listed in **Table S2**.

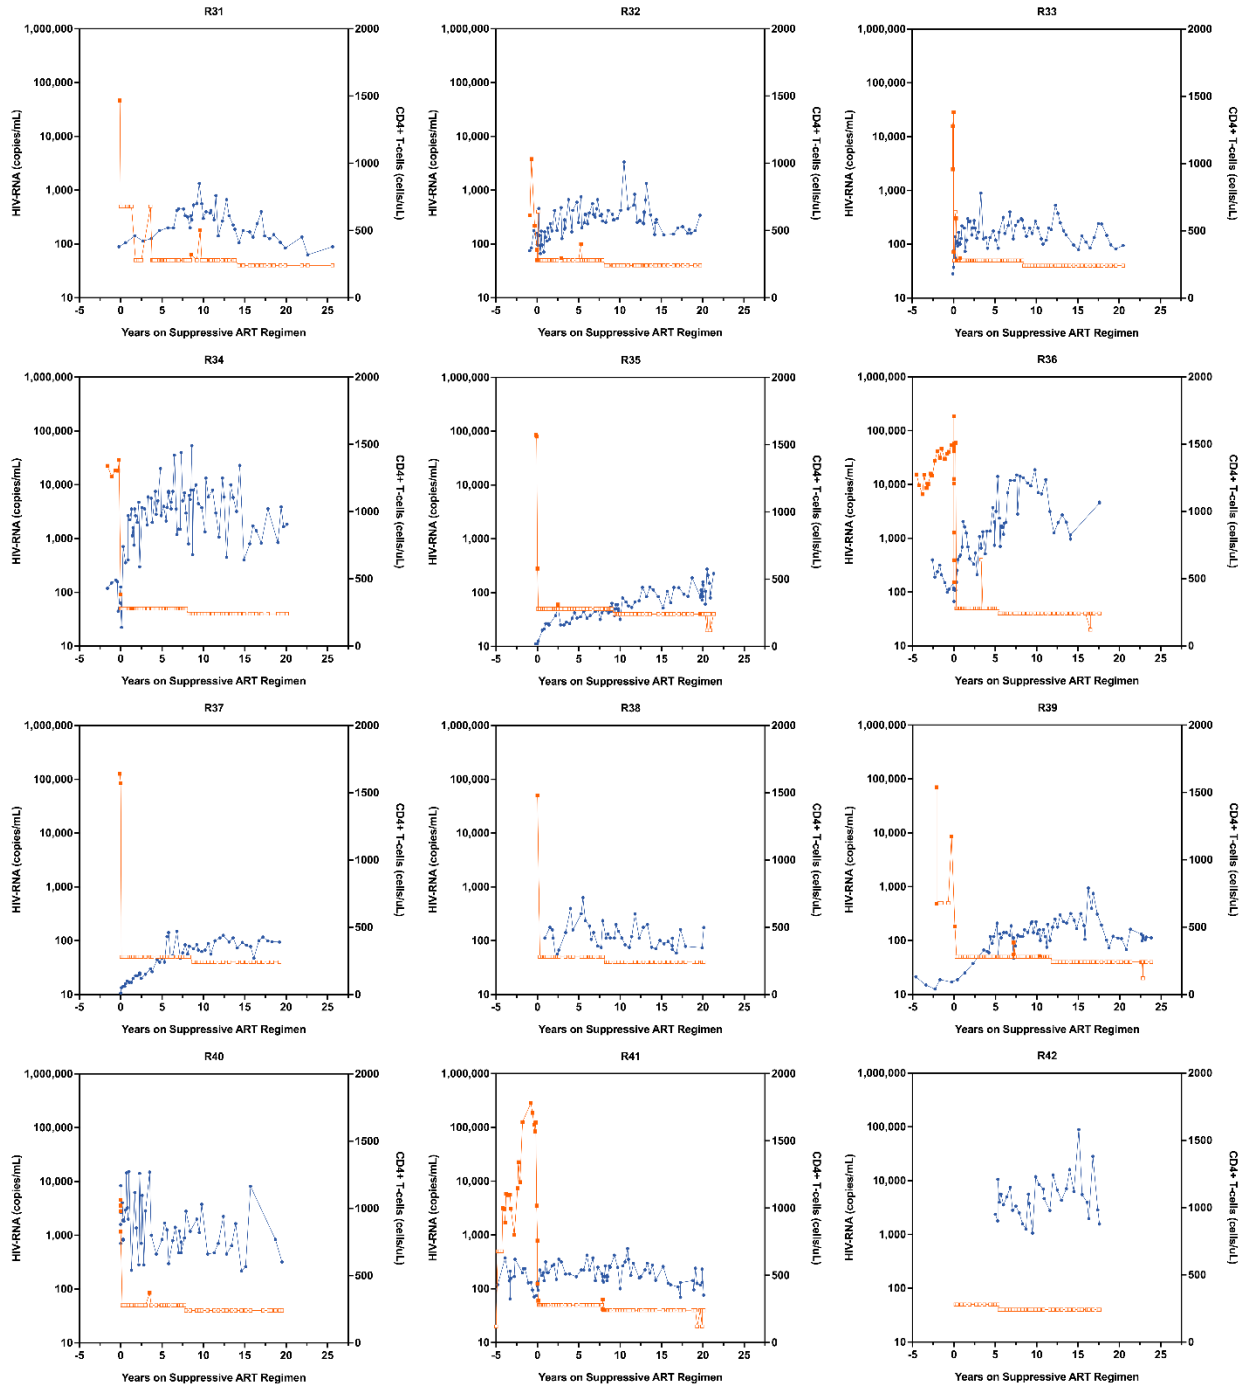

**Figure S3.** Plasma HIV-1 RNA levels and CD4<sup>+</sup> T counts of participants R31-R42. Levels of plasma HIV-1 RNA in copies/ml (solid orange squares) and CD4<sup>+</sup> T cells in cells/ $\mu$ l (blue circles) are plotted as a function of time on suppressive ART. Plasma HIV-1 RNA values below the limit of detection are denoted using open orange squares and plotted at the limit of detection of the assay used. Fluctuations in plasma HIV-1 RNA levels prior to initiation of suppressive ART mostly reflect regimen changes. Fluctuations after initiation of suppressive ART largely reflect differences in the limit of detection of the assay used. The limit of detection for most assays was 50 copies/ml or 20 copies/ml. ART regimens for each participant are listed in **Table S2**.

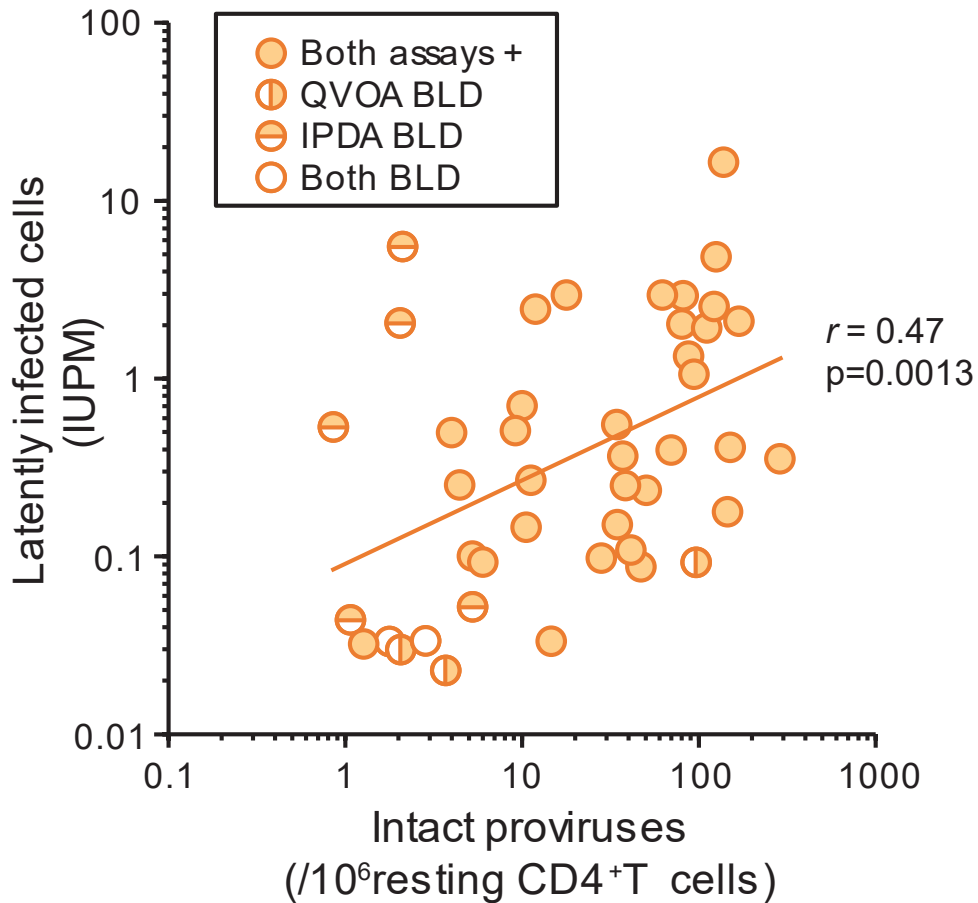

**Figure S4.** Correlation between reservoir assays. For 44 samples from PWH on very long-term ART, enough cells were available to perform both the QVOA and IPDA. The mean duration of suppressive ART at the time of sampling for these samples was 22.1 years. Samples for which infected cell or proviral frequencies were below the limit of detection (BLD) of the relevant assays are indicated by unshaded half or full circles. In these cases, frequencies were estimated as described in **Figure 2**. Correlation between assay values was evaluated using the Spearman rank correlation.

## QVOA

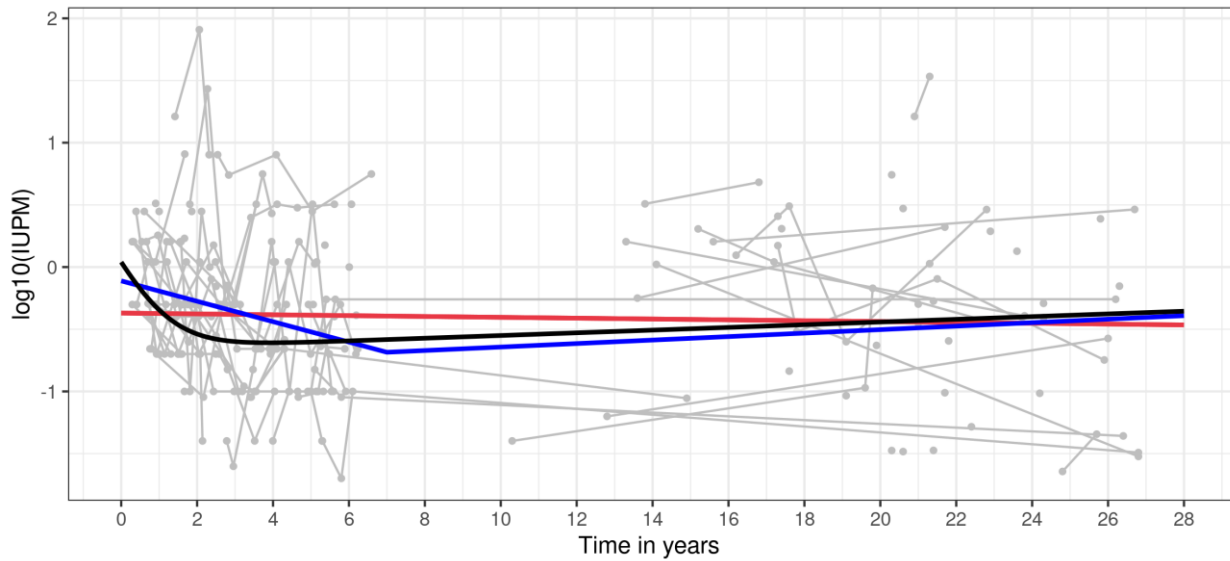

**Figure S5.** Fits to the QVOA data using a linear model (red), segmented exponential model (blue) and a biexponential model (black). For the linear model, the half-life is 89 yrs. For the segmented model, the first phase half-life was fixed at 44 months, the break point was fixed at 7 years, and the estimated second phase doubling time was 23 years. For the biexponential model, the estimated first phase half-life was 6 months and the second phase doubling time was 28 years (**Table S5**).



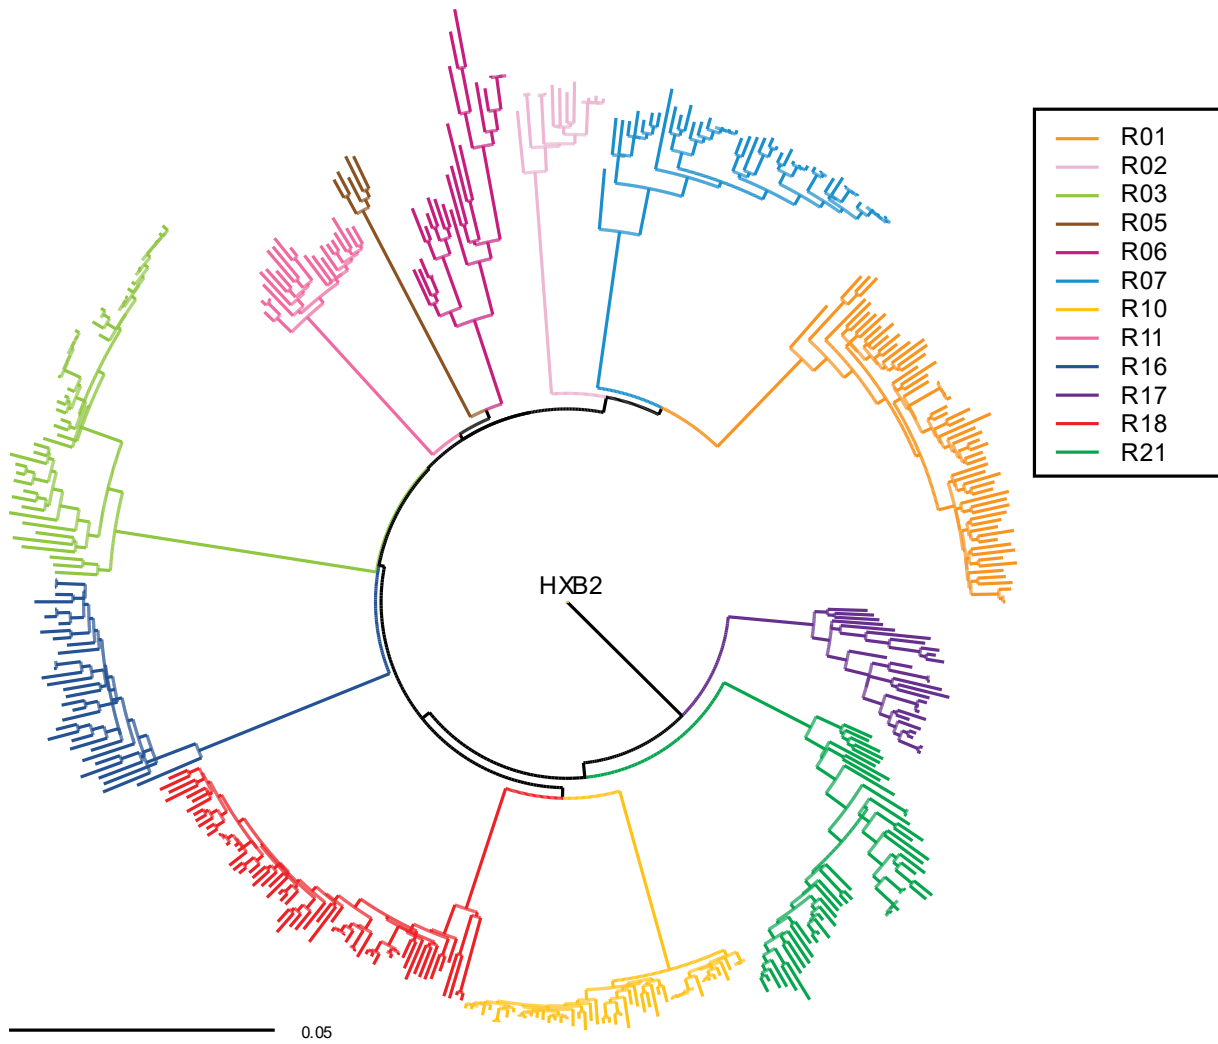

**Figure S6.** Participant-specific clustering of *env* sequences from positive viral outgrowth wells and proviral sequencing. A neighbor-joining phylogenetic tree of combined *env* sequences from 12 representative participants for whom sequencing was done is shown. The tree was rooted to HXB2. Bar indicates number of nucleotide substitutions per site.

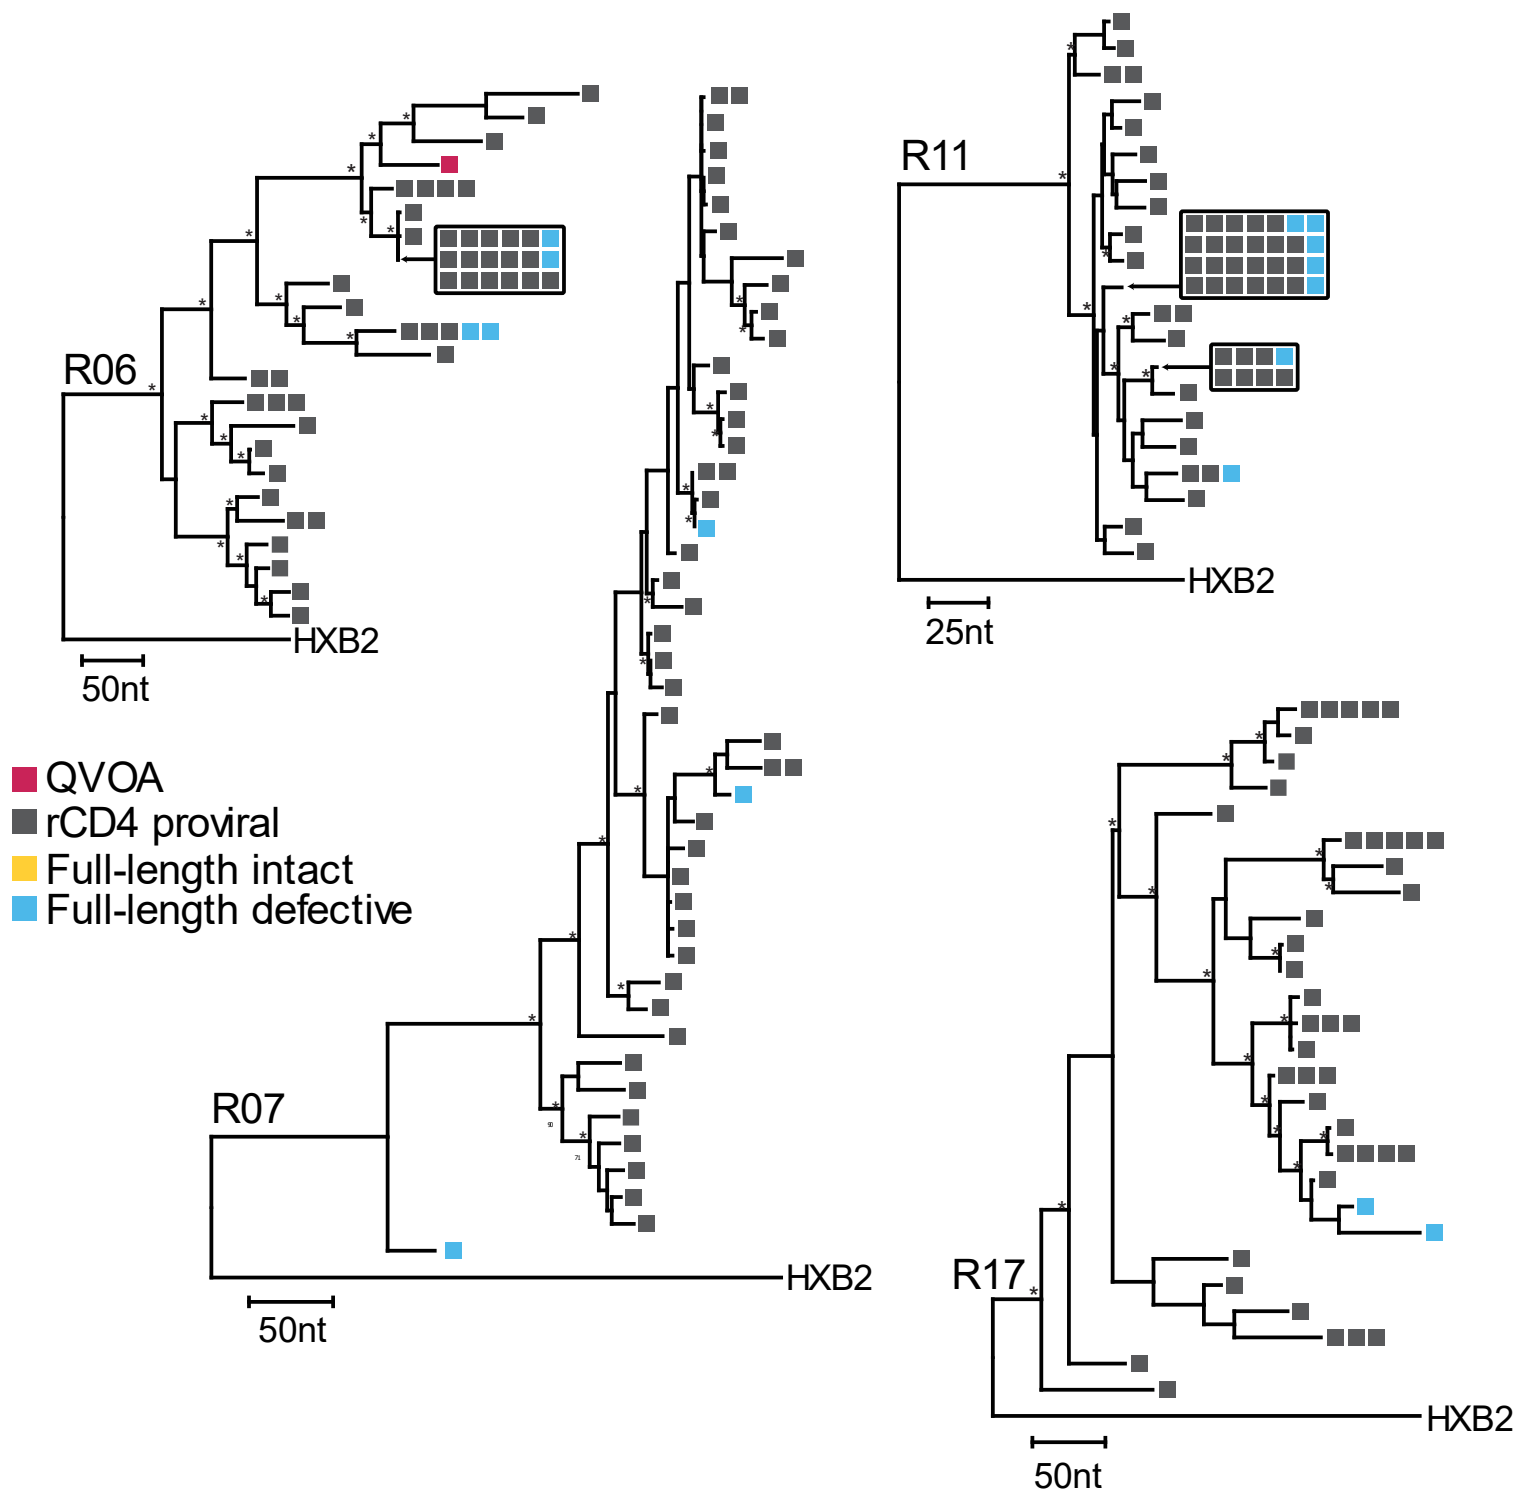

**Figure S7.** Large expanded clones dominate the population of persistent proviruses in PWH on very long-term ART who have less viral outgrowth. Maximum likelihood phylogenetic trees of *env* sequences for participants not shown in **Figure 5**, each rooted to HXB2. Single genome

sequencing of *env* was performed on cDNA reverse-transcribed from extracted viral RNA from QVOA wells scored positive for viral outgrowth (red) or proviral DNA from resting CD4<sup>+</sup> T cells (rCD4, grey). Near full-length genome sequences were obtained using the same proviral DNA and are annotated as intact (yellow) or defective (blue). Bootstrap values greater than 70% are noted by an asterisk. Genetic distance is represented by the scale in nucleotides.

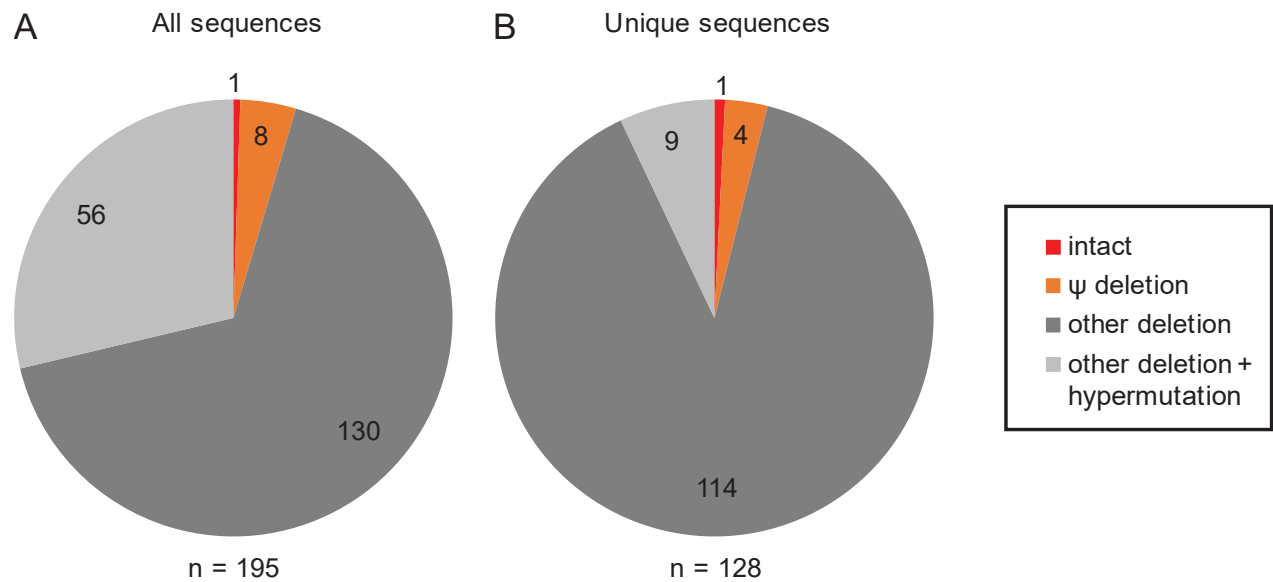

**Figure S8.** Near full-length sequences of proviruses from PWH on very long-term ART. **(A)** Properties of 195 independent sequences from 9 representative study participants. Sequences were classified as previously described (34, 38, 92) into the following categories: intact (no deletions, hypermutation, or internal stop codons),  $\Psi$  deletions (small deletions in the packaging signal region), other deletions, and other deletions plus G→A hypermutation. We did not find any defective proviruses that had internal stop codons as the sole defect. All of the hypermutant proviruses also had deletions. **(B)** Unique sequences from the sequence set in **A**. Independent sequences identical to each other were collapsed into a single sequence to reduce distortions in the landscape resulting from expansion of a single clone.

**Table S1.** Characteristics of study participants.

| ID     | Age* | Sex | Race† | Time HIV+ (years) | Current ART regimen‡ | Time on Suppressive ART regimen§ (years) | Age at initiation of suppressive ART (yrs) | CD4 nadir (cells/µl) | Plasma HIV-1 RNA* (copies/ml) |
|--------|------|-----|-------|-------------------|----------------------|------------------------------------------|--------------------------------------------|----------------------|-------------------------------|
| R01    | 68   | M   | AA    | 25.3              | DTG/DOR              | 21.7                                     | 46.3                                       | >200                 | <20                           |
| R02    | 57   | F   | AA    | 22.9              | ABC/DTG/3TC          | 22.8                                     | 34.2                                       | 320                  | <20                           |
| R03    | 48   | M   | AA    | 30.4              | BIC/FTC/TAF          | 23.6                                     | 24.4                                       | 316                  | <20                           |
| R04    | 58   | M   | W     | 28.4              | ABC/DTG/3TC          | 17.4                                     | 40.6                                       | 216                  | <20                           |
| R05    | 65   | M   | W     | 26.1              | 3TC/DTG/DRV/r        | 25.9                                     | 39.1                                       | 214                  | <20                           |
| R06    | 62   | M   | AA    | 30.5              | BIC/FTC/TAF          | 21.4                                     | 40.6                                       | 18                   | <20                           |
| R07    | 62   | M   | AA    | 29.8              | DTG/RPV              | 19.1                                     | 42.9                                       | 286                  | <20                           |
| R08    | 62   | M   | AA    | 26.0              | DTG/RPV, DRV/c       | 21.4                                     | 40.6                                       | 180                  | <20                           |
| R09    | 68   | F   | AA    | 35.8              | DTG/RPV, DRV/c       | 19.9                                     | 48.1                                       | 64                   | <20                           |
| R10    | 72   | M   | W     | 30.8              | BIC/FTC/TAF          | 22.8                                     | 49.2                                       | 80                   | <20                           |
| R11    | 67   | F   | AA    | 24.8              | BIC/FTC/TAF          | 22.4                                     | 44.6                                       | 145                  | <20                           |
| R12    | 58   | F   | AA    | 35.8              | BIC/FTC/TAF          | 24.3                                     | 33.7                                       | 33                   | <20                           |
| R13    | 68   | F   | AA    | 28.8              | ABC/DTG/3TC          | 22.9                                     | 45.1                                       | 155                  | <20                           |
| R14    | 66   | M   | AA    | 30.3              | RPV/DTG              | 17.3                                     | 48.7                                       | 8                    | <20                           |
| R15    | 63   | M   | AA    | 25.8              | BIC/FTC/TAF          | 21.8                                     | 41.2                                       | 95                   | <20                           |
| R16    | 56   | M   | PI    | 30.8              | BIC/FTC/TAF, ECV     | 25.4                                     | 31.7                                       | 32                   | <30                           |
| R17    | 71   | M   | W     | 27.4              | FTC/TAF, DTG         | 25.7                                     | 45.3                                       | 9                    | <30                           |
| R18    | 67   | M   | W     | 36.7              | DTG, RPV/TAF/FTC     | 21.3                                     | 45.7                                       | 86                   | <30                           |
| R19    | 57   | M   | W     | 19.9              | RPV/TAF/FTC          | 19.8                                     | 37.2                                       | 200                  | <30                           |
| R20    | 55   | M   | AA    | 23.8              | RPV/TDF/FTC          | 23.8                                     | 31.2                                       | 25                   | <30                           |
| R21    | 81   | M   | W     | 36.3              | BIC/FTC/TAF          | 26.7                                     | 54.3                                       | 270                  | <30                           |
| R22    | 75   | M   | W     | 36.7              | BIC/FTC/TAF          | 26.8                                     | 48.2                                       | 13                   | <30                           |
| R23    | 68   | M   | W     | 34.4              | ABC/DTG/3TC          | 26.0                                     | 42.0                                       | 120                  | <30                           |
| R24    | 63   | M   | AA    | 20.8              | BIC/FTC/TAF          | 16.8                                     | 46.2                                       | 185                  | <20                           |
| R25    | 70   | M   | W     | 37.8              | RPV/FTC/TAF/EVG/c    | 25.8                                     | 44.2                                       | 3                    | <20                           |
| R26    | 70   | M   | W     | 35.3              | BIC/FTC/TAF/DOR      | 21.3                                     | 48.7                                       | 370                  | <20                           |
| R27    | 64   | M   | W     | 29.8              | RAL/DOR/MVC          | 26.8                                     | 37.2                                       | 2                    | <20                           |
| R28    | 56   | M   | W     | 28.4              | BIC/FTC/TAF/DOR      | 26.3                                     | 29.7                                       | 270                  | <20                           |
| R29    | 60   | M   | W     | 34.4              | BIC/FTC/TAF          | 14.9                                     | 45.1                                       | 107                  | <20                           |
| R30    | 62   | M   | W     | 35.4              | BIC/FTC/TAF          | 26.4                                     | 35.6                                       | 475                  | <40                           |
| R31    | 59   | M   | W     | 26.4              | BIC/FTC/TAF          | 26.2                                     | 32.8                                       | 24                   | <20                           |
| R32    | 57   | M   | W     | 20.4              | BIC/FTC/TAF          | 20.3                                     | 36.7                                       | 329                  | <40                           |
| R33    | 59   | M   | W     | 21.1              | ABC/DTG/3TC          | 21.0                                     | 38.0                                       | 180                  | <40                           |
| R34    | 57   | M   | W     | 29.8              | ABC/DTG/3TC          | 20.6                                     | 36.4                                       | 140                  | <40                           |
| R35    | 58   | M   | Mixed | 22.5              | ABC/DTG/3TC          | 21.7                                     | 36.3                                       | 20                   | <40                           |
| R36    | 86   | M   | W     | 22.5              | ABC/DTG/3TC          | 17.6                                     | 68.4                                       | 350                  | <40                           |
| R37    | 53   | M   | H     | 23.4              | ABC/DTG/3TC          | 21                                       | 32.0                                       | 8                    | <40                           |
| R38    | 52   | M   | AS    | 20.7              | ABC/DTG/3TC          | 20.6                                     | 31.4                                       | <200                 | <40                           |
| R39    | 72   | M   | W     | 29.4              | BIC/FTC/TAF, DOR     | 24.2                                     | 47.8                                       | 10                   | <40                           |
| R40    | 47   | M   | W     | 20.5              | BIC/FTC/TAF          | 20.3                                     | 26.7                                       | 536                  | <40                           |
| R41    | 60   | M   | W     | 32.7              | MVC/DOR/DTG          | 20.3                                     | 39.7                                       | 258                  | <40                           |
| R42    | 65   | M   | W     | 30.7              | ABC/DTG/3TC          | 17.9                                     | 47.1                                       | <200                 | <40                           |
| Mean   | 63   |     |       | 28.6              |                      | 22.1                                     | 40.8                                       | 161                  |                               |
| Median | 62   |     |       | 29.1              |                      | 21.7                                     | 40.6                                       | 150                  |                               |

\*At most recent sample date.

†AA, African-America; W, White; H, Hispanic, PI, Pacific Islander; AS, Asian.

‡Abbreviations: 3TC, lamivudine; ABC, abacavir; BIC, bictegravir; /c, cobicistat; DOR, doravirine; DRV, darunavir; DTG, dolutegravir; ECV, entecavir; EVG, elvitegravir; FTC, emtricitabine; MVC, maraviroc; RAL, raltegravir; RPV, rilpivirine; /r, ritonavir; TAF, tenofovir alafenamide; TDF, tenofovir disoproxil fumarate.

§Time on an ART regimen or regimens that maintained continuous suppression of viremia to below the limit of detection through the most recent sampling date (except for isolated blips).

**Table S2.** Changes in drug regimens during suppressive ART.

| ID  | Regimen*            | Time on suppressive ART (years) |
|-----|---------------------|---------------------------------|
| R1  | 3TC/ZDV/EFV         | 0.0                             |
|     | FTC/TFV/EFV         | 6.3                             |
|     | FTC/RAL/ATV/RTV     | 7.5                             |
|     | DTG/DOR             | 18.1                            |
| R2  | d4T/3TC/EFV         | 0.0                             |
|     | 3TC/ABC/EFV         | 3.0                             |
|     | 3TC/ABC/NVP         | 4.3                             |
| R3  | 3TC/ABC/DTG         | 16.7                            |
|     | NFV/EFV/d4T/3TC     | 0.0                             |
|     | EFV/d4T/3TC         | 1.3                             |
|     | EFV/ABC/3TC         | 5.4                             |
|     | FTC/RPV/TDF         | 14.1                            |
|     | FTC/RPV/TAF         | 19.2                            |
| R4  | BIC/FTC/TAF         | 20.5                            |
|     | FTC/ddI/ABC/ATV/RTV | 0.0                             |
|     | ABC/3TC/ATV/RTV     | 4.0                             |
|     | ABC/3TC/DTG         | 11.7                            |
| R5  | 3TC/IDV/ZDV         | 0.0                             |
|     | 3TC/EFV/ABC/ZDV     | 4.3                             |
|     | 3TC/EFV/ABC/ATV/RTV | 8.8                             |
|     | 3TC/DTG/DRV/RTV     | 18.7                            |
| R6  | 3TC/d4T/EFV         | 0.0                             |
|     | FTC/TDF/EFV         | 3.8                             |
|     | EVG/COBI/FTC/TAF    | 16.3                            |
|     | BIC/FTC/TAF         | 21.3                            |
| R7  | RTV/ATV/ddI/TDF     | 0.0                             |
|     | LPV/RTV/ddI/TDF     | 4.6                             |
|     | RTV/ATV/ddI/TDF     | 7.3                             |
|     | RTV/ATV/RAL/TDF     | 8.1                             |
|     | RTV/ATV/FTC/TDF     | 8.2                             |
|     | RTV/ATV/FTC/ETR     | 9.1                             |
|     | ATV/COBI/FTC/TAF    | 14.0                            |
|     | DTG/RPV             | 15.0                            |
| R8  | LPV/RTV/IDV/EFV     | 0.0                             |
|     | DRV/RTV/RAL/EFV     | 7.4                             |
|     | DRV/COBI/DTG/RPV    | 18.0                            |
| R9  | 3TC/AZT/TDF/LPV/RTV | 0.0                             |
|     | LPV/RTV/FTC/TDF/RAL | 5.4                             |
|     | LPV/RTV/ETR/RAL     | 9.8                             |
|     | DRV/RTV/ETR/RAL     | 11.5                            |
|     | DRV/RTV/FTC/TDF     | 12.8                            |
|     | DTG/RPV/3TC/TAF     | 13.8                            |
|     | DRV/COBI            | 15.9                            |
| R10 | RTV/3TC/ABC         | 0.0                             |
|     | LPV/RTV/3TC/ABC/TDF | 4.1                             |
|     | TDF/RAL/ETR         | 9.2                             |
|     | 3TC/ABC/RAL/ETR     | 12.3                            |
|     | BIC/FTC/TAF         | 18.5                            |
| R11 | 3TC/d4T/EFV         | 0.0                             |
|     | 3TC/EFV/TDF/ABC     | 2.9                             |
|     | 3TC/EFV/TDF         | 3.5                             |
|     | FTC/TDF/EFV         | 4.7                             |
|     | ABC/DTG/3TC         | 14.6                            |
|     | BIC/FTC/TAF         | 17.8                            |
| R12 | RTV/SQV/EFV/ddI     | 0.0                             |
|     | ddI/EFV             | 0.8                             |
|     | ddI/EFV/RTV/IDV     | 1.2                             |
|     | ddI/LPV/RTV/NVP     | 2.2                             |
|     | LPV/RTV/FTC/TDF/NVP | 6.8                             |
|     | EFV/FTC/TDF/LPV/RTV | 10.4                            |

|     |                             |      |
|-----|-----------------------------|------|
|     | RTV/DRV/EFV/FTC/TDF         | 12.3 |
|     | FTC/TAF/EVG/COBI            | 17.7 |
|     | FTC/TAF/EVG/COBI/DRV        | 21.3 |
|     | FTC/TAF/EVG/COBI            | 19.1 |
|     | BIC/FTC/TAF                 | 20.2 |
| R13 | NFV/d4T/3TC                 | 0.0  |
|     | ABC/3TC/AZT/NFV             | 2.4  |
|     | 3TC/AZT/EFV                 | 2.8  |
|     | EFV/FTC/TDF                 | 8.9  |
|     | ABC/DTG/3TC                 | 16.0 |
| R14 | LPV/RTV/ABC/3TC/AZT/TDF/EFV | 0.0  |
|     | LPV/RTV/ABC/3TC/AZT/TDF     | 1.1  |
|     | DRV/RTV/RAL/ETR             | 2.9  |
|     | DTG/RPV                     | 15.8 |
| R15 | 3TC/AZT/NFV                 | 0.0  |
|     | 3TC/AZT/NFV/ABC             | 0.2  |
|     | ABC/3TC/AZT/TDF/NFV         | 1.0  |
|     | ABC/3TC/AZT/TDF/ATV/RTV     | 2.9  |
|     | FTC/TDF/ATV/RTV             | 7.9  |
|     | FTC/TAF/EVG/COBI            | 15.2 |
|     | BIC/FTC/TAF                 | 18.7 |
| R16 | D4T/3TC/EFV/RTV/FTV/SQV     | 0.0  |
|     | ABC/3TC/EFV/RTV/SQV         | 4.0  |
|     | ABC/3TC/EFV/LPV/RTV         | 4.3  |
|     | FTC/TDF/EFV/LPV/RTV         | 11.6 |
|     | FTC/TDF/EFV                 | 13.1 |
|     | EVG/COBI/FTC/TAF            | 20.4 |
|     | BIC/FTC/TAF                 | 21.0 |
| R17 | D4T/3TC/IDV                 | 0.0  |
|     | 3TC/TDF/ATV/RTV             | 10.1 |
|     | ABC/3TC/ATV/RTV             | 14.4 |
|     | ABC/DTG/3TC                 | 19.5 |
|     | FTC/TAF/DTG                 | 22.6 |
| R18 | DDI/EFV/TDF/FTC             | 7.8  |
|     | EFV/TDF/FTC/RAL             | 9.1  |
|     | RPV/TAF/FTC/DTG             | 15.8 |
| R19 | EFV/AZT/3TC                 | 0.0  |
|     | EFV/FTC/TDF                 | 4.3  |
|     | RPV/TDF/FTC                 | 12.2 |
|     | RPV/TAF/FTC                 | 16.5 |
| R20 | ABC/D4T/3TC/EFV             | 0.0  |
|     | ABC/3TC/EFV                 | 1.9  |
|     | RPV/TDF/FTC                 | 15.0 |
| R21 | ABC/D4T/3TC/TDF/EFV         | 8.0  |
|     | ABC/3TC/TDF/EFV             | 8.6  |
|     | EFV/TDF/FTC                 | 13.3 |
|     | FTC/ABC/3TC/EFV             | 16.6 |
|     | ABC/3TC/EFV                 | 17.2 |
|     | EFV/TDF/FTC                 | 18.1 |
|     | BIC/FTC/TAF                 | 26.7 |
| R22 | ABC/3TC/IDV                 | 0.0  |
|     | AZT/3TC/ABC                 | 7.8  |
|     | ABC/3TC/TDF                 | 8.1  |
|     | AZT/TDF/ABC/3TC             | 8.9  |
|     | ABC/3TC/ATV/RTV             | 9.5  |
|     | ABC/3TC/ATV                 | 10.5 |
|     | ABC/3TC/RAL                 | 16.6 |
|     | ABC/DTG/3TC                 | 20.5 |
|     | BIC/FTC/TAF                 | 26.7 |
| R23 | ABC/D4T/NFV                 | 0.0  |
|     | TDF/ABC/3TC/ATV/RTV         | 8.7  |
|     | TDF/ABC/3TC/RTV/DRV         | 15.1 |
|     | ABC/3TC/RTV/DRV             | 17.3 |
|     | ABC/DTG/3TC                 | 18.3 |
|     | FTC/TAF/DTG                 | 25.7 |
|     | ABC/DTG/3TC                 | 26.0 |



|     |                             |      |
|-----|-----------------------------|------|
| R24 | ATV                         | 0.0  |
|     | ATV/RTV                     | 3.8  |
|     | ATV                         | 4.0  |
|     | 3TC/AZT/ATV                 | 8.1  |
|     | ATV/FTC/TAF                 | 12.3 |
|     | BIC/FTC/TAF                 | 13.2 |
| R25 | 3TC/IDV/d4T                 | 0.0  |
|     | 3TC/SQV/RTV/d4T             | 2.5  |
|     | SQV/RTV/NVP/ABC             | 3.5  |
|     | LPV/RTV/NVP/ABC             | 5.9  |
|     | SQV/LPV/RTV/NVP/ABC         | 8.4  |
|     | RTV/DRV/FTC/TDF/NVP         | 12.2 |
|     | ETR/RAL/RTV/DRV             | 14.6 |
|     | FTC/TAF/EVG/COBI/RPV        | 18.9 |
| R26 | 3TC/LPV/RTV/d4T             | 0.0  |
|     | LPV/RTV/d4T                 | 0.1  |
|     | LPV/RTV/d4T/ABC             | 2.4  |
|     | LPV/RTV/d4T                 | 2.6  |
|     | RTV/TDF                     | 3.1  |
|     | RTV/ATV/TDF                 | 3.2  |
|     | ATV/d4T                     | 3.3  |
|     | 3TC/RTV/ATV/TDF             | 3.3  |
|     | 3TC/EFV/TDF                 | 4.3  |
|     | 3TC/NVP/TDF                 | 6.3  |
|     | FTC/TDF/NVP                 | 7.7  |
|     | 3TC/NVP/TDF                 | 8.1  |
|     | FTC/TDF/NVP                 | 8.7  |
|     | MVC/ETR/RAL                 | 11.8 |
|     | FTC/TAF/EVG/COBI/DRV        | 15.7 |
|     | BIC/FTC/TAF/DOR             | 18.3 |
| R27 | SQV/LPV/RTV/EFV/ABC/3TC/AZT | 10.3 |
|     | MVC/RAL/LPV/RTV/ABC/TDF     | 12.4 |
|     | MVC/RAL/ABC/RTV/DRV/TDF     | 16.4 |
|     | MVC/RAL/ABC/RTV/DRV         | 16.7 |
|     | MVC/RAL/ABC/RTV/DRV         | 19.6 |
|     | FTC/TAF/RPV/DTG             | 20.8 |
|     | RPV/FTC/TAF/EVG/COBI        | 21.0 |
|     | FTC/TAF/RPV/RAL             | 22.0 |
|     | FTC/TAF/RAL                 | 22.3 |
|     | DTG/RPV                     | 22.8 |
|     | DTG/RPV/RTV/DRV             | 23.0 |
|     | DTG/RPV                     | 23.0 |
|     | FTC/TAF/DTG/RPV             | 23.2 |
|     | MVC/DRV/COBI                | 23.6 |
|     | 3TC/DTG/DOR                 | 23.8 |
|     | RALHD/DOR                   | 24.5 |
|     | MVC/RALHD/DOR               | 25.8 |
| R28 | 3TC/AZT                     | 10.3 |
|     | LPV/RTV/FTC/TDF             | 16.8 |
|     | LPV/RTV/FTC/TDF/EVG/COBI    | 17.8 |
|     | FTC/TDF/EVG/COBI            | 17.8 |
|     | ETR/FTC/TDF/EVG/COBI        | 18.8 |
|     | RPV/DRV/COBI/DTG            | 19.1 |
|     | RPV/RTV/DRV/COBI/DTG        | 19.4 |
|     | RPV/RTV/DRV/DTG             | 20.3 |
|     | RPV/DTG                     | 20.6 |
|     | RPV/DRV/COBI/DTG            | 21.4 |
|     | RPV/RTV/DRV/DTG             | 21.9 |
|     | RPV/FTC/TAF/EVG/COBI        | 22.1 |
|     | BIC/FTC/TAF/DOR             | 26.1 |
| R29 | LPV/RTV/ABC                 | 0.0  |
|     | LPV/RTV/FTC/TDF             | 0.9  |
|     | FTC/TDF/NVP                 | 1.0  |
|     | ABC/NVP                     | 4.3  |
|     | BIC/FTC/TAF                 | 11.8 |
| R30 | 3TC/SQV/AZT                 | 0.0  |

|     |                         |      |
|-----|-------------------------|------|
|     | 3TC/IDV/AZT             | 0.4  |
|     | 3TC/IDV/RTV/AZT         | 3.4  |
|     | 3TC/AZT/LPV/RTV         | 7.5  |
|     | 3TC/AZT/LPV/RTV/TDF     | 11.0 |
|     | LPV/RTV/FTC/TDF         | 11.1 |
|     | MVC/RAL/LPV/RTV/FTC/TDF | 11.6 |
|     | LPV/RTV/FTC/TDF         | 12.6 |
|     | RTV/DRV/FTC/TDF         | 16.5 |
|     | MVC/ETR/RAL             | 19.6 |
|     | FTC/TAF/DTG             | 20.4 |
|     | FTC/TAF/EVG/COBI        | 21.5 |
| R31 | 3TC/SQV/AZT             | 0.0  |
|     | 3TC/IDV/AZT             | 0.3  |
|     | 3TC/AZT/EFV             | 3.8  |
|     | 3TC/AZT/NVP             | 5.3  |
|     | 3TC/NVP/ABC             | 7.7  |
|     | ABC/NVP                 | 9.8  |
|     | BIC/FTC/TAF             | 25.8 |
| R32 | 3TC/AZT/LPV/RTV         | 0.0  |
|     | LPV/RTV/ABC             | 0.0  |
|     | NFV/ABC                 | 0.1  |
|     | DLV/NFV                 | 3.0  |
|     | LPV/RTV                 | 4.2  |
|     | LPV/RTV/FTC/TDF         | 4.9  |
|     | RAL/LPV/RTV/FTC/TDF     | 5.3  |
|     | MVC/RAL/LPV/RTV/FTC/TDF | 5.7  |
|     | RAL/LPV/RTV/FTC/TDF     | 7.0  |
|     | 3TC/MVC/RAL/LPV/RTV     | 9.2  |
|     | FTC/TAF/EVG/COBI        | 14.3 |
|     | BIC/FTC/TAF             | 17.1 |
| R33 | 3TC/AZT/LPV/RTV/ABC     | 0.0  |
|     | LPV/RTV/ABC/3TC/AZT     | 0.6  |
|     | 3TC/RTV/ATV/ABC         | 2.8  |
|     | ABC/RTV/ATV             | 3.9  |
|     | LPV/RTV/ABC             | 5.6  |
|     | LPV/RTV/FTC/TDF         | 7.1  |
|     | ETR/ABC                 | 8.8  |
|     | ABC/DTG                 | 12.1 |
|     | ABC/DTG/3TC             | 13.1 |
| R34 | 3TC/IDV/AZT             | 0.0  |
|     | 3TC/AZT/LPV/RTV         | 0.2  |
|     | 3TC/AZT/LPV/RTV/ABC     | 0.3  |
|     | LPV/RTV/ABC/3TC/AZT     | 0.3  |
|     | 3TC/RTV/ATV/ABC         | 2.2  |
|     | ABC/RTV/ATV             | 3.7  |
|     | LPV/RTV/ABC             | 4.8  |
|     | MVC/RAL/LPV/RTV/ABC     | 6.0  |
|     | MVC/RAL/ABC/RTV/DRV     | 10.6 |
|     | MVC/RAL/ABC             | 10.8 |
|     | ABC/DTG/3TC             | 12.7 |
|     | BIC/FTC/TAF             | 16.5 |
|     | ABC/DTG/3TC             | 16.5 |
|     | BIC/FTC/TAF             | 16.8 |
|     | ABC/DTG/3TC             | 17.0 |
| R35 | 3TC/AZT/LPV/RTV         | 0.0  |
|     | 3TC/LPV/RTV/TDF         | 2.4  |
|     | 3TC/LPV/RTV/ABC         | 3.3  |
|     | 3TC/RTV/ATV/ABC         | 3.5  |
|     | ABC/RTV/ATV             | 5.8  |
|     | EFV/FTC/TDF             | 8.3  |
|     | ABC/EFV                 | 12.0 |
|     | ABC/DTG                 | 12.8 |
|     | ABC/DTG/3TC             | 13.9 |
| R36 | 3TC/BLINDED TRIAL/TDF   | 0.0  |
|     | LPV/RTV/FTC/TDF         | 2.6  |
|     | RAL/FTC/TDF             | 2.8  |

|     |                          |      |
|-----|--------------------------|------|
|     | RAL/ABC                  | 8.3  |
|     | ABC/DTG                  | 9.2  |
|     | ABC/DTG/3TC              | 10.3 |
| R37 | 3TC/AZT/EFV/ABC          | 0.0  |
|     | ABC/EFV                  | 4.6  |
|     | EFV/FTC/TDF              | 6.8  |
|     | ABC/DTG/3TC              | 13.2 |
| R38 | 3TC/AZT/EFV              | 0.0  |
|     | 3TC/EFV/ABC              | 1.8  |
|     | ABC/EFV                  | 4.3  |
|     | EFV/FTC/TDF              | 6.3  |
|     | ABC/EFV                  | 9.3  |
|     | ABC/DTG                  | 12.6 |
|     | ABC/DTG/3TC              | 12.9 |
| R39 | EFV/ddI/NFV/d4T/ABC      | 0.0  |
|     | LPV/RTV/EFV/ddI/ABC      | 2.1  |
|     | LPV/RTV/EFV/TDF/ABC      | 3.6  |
|     | 3TC/RTV/ATV/EFV/ABC      | 5.6  |
|     | ABC/RTV/ATV/EFV          | 7.3  |
|     | LPV/RTV/ABC/EFV          | 9.7  |
|     | LPV/RTV/EFV/FTC/TDF      | 10.0 |
|     | RAL/LPV/RTV/EFV          | 11.1 |
|     | RPV/DRV/COBI/DTG         | 16.2 |
|     | RPV/RTV/DRV/DTG          | 16.9 |
|     | RPV/DRV/COBI/DTG         | 18.0 |
|     | BIC/FTC/TAF/DOR          | 22.6 |
| R40 | 3TC/AZT/LPV/RTV          | 0.0  |
|     | 3TC/AZT/EFV              | 1.6  |
|     | 3TC/EFV/ABC              | 1.7  |
|     | ABC/EFV                  | 3.8  |
|     | EFV/FTC/TDF              | 6.4  |
|     | FTC/TAF/EVG/COBI         | 13.9 |
|     | BIC/FTC/TAF              | 18.8 |
| R41 | 3TC/LPV/RTV/EFV/TDF/ABC  | 0.0  |
|     | ABC/RTV/ATV/EFV/TDF      | 3.7  |
|     | ETR/ABC/RTV/DRV          | 7.6  |
|     | ETR/RAL/ABC/RTV/DRV      | 7.9  |
|     | RPV/DRV/COBI/ABC/DTG/3TC | 12.4 |
|     | DOR/DRV/COBI/ABC/DTG/3TC | 17.2 |
|     | MVC/DOR/DTG              | 19.8 |
| R42 | 3TC/AZT/NFV              | 0.0  |
|     | 3TC/AZT/DLV              | 1.0  |
|     | ETR/ABC                  | 5.2  |
|     | ABC/DTG/3TC              | 10.6 |

\*Changes in drug regimens during suppressive ART. For drug abbreviations, see **Table S1**.

**Table S3.** Blips during suppressive ART

| ID  | Blips >100 (c/ml) | Time on suppressive ART (yrs) | Assay LOD* (c/ml) | Previous HIV-1 RNA† (c/ml) | Time on suppressive ART (yrs) | Next HIV-1 RNA‡ (c/ml) | Time on suppressive ART (yrs) | Time since blip (days) |
|-----|-------------------|-------------------------------|-------------------|----------------------------|-------------------------------|------------------------|-------------------------------|------------------------|
| R2  | 228               | 8.69                          | 50                | <400                       | 8.59                          | <50                    | 9.22                          | 196                    |
|     | 121               | 21.50                         | 20                | <20                        | 21.36                         | <20                    | 21.71                         | 75                     |
| R3  | 113               | 3.38                          | 50                | 16                         | 3.21                          | 11                     | 3.40                          | 6                      |
|     | 126               | 5.41                          | 50                | <50                        | 5.14                          | <50                    | 5.42                          | 3                      |
| R6  | 160               | 15.61                         | 20                | <20                        | 15.00                         | <20                    | 15.98                         | 133                    |
| R8  | 109               | 11.24                         | 50                | <50                        | 10.42                         | <20                    | 11.30                         | 21                     |
| R10 | 280               | 2.50                          | 50                | 148                        | 0.25                          | 80                     | 4.15                          | 602                    |
| R11 | 158               | 1.72                          | 50                | 25                         | 1.04                          | 177                    | 1.99                          | 100                    |
|     | 177               | 1.99                          | 50                | 158                        | 1.72                          | 64                     | 2.41                          | 154                    |
| R12 | 186               | 0.88                          | 50                | 11                         | 0.64                          | 171                    | 1.04                          | 57                     |
|     | 171               | 1.04                          | 50                | 186                        | 0.88                          | 16                     | 1.12                          | 29                     |
|     | 195               | 3.07                          | 50                | 24                         | 3.02                          | 16                     | 3.27                          | 72                     |
|     | 3851              | 10.85                         | 50                | <50                        | 10.63                         | <50                    | 10.87                         | 7                      |
| R13 | 1030              | 0.80                          | 50                | 13                         | 0.61                          | 17                     | 0.84                          | 13                     |
|     | 219               | 1.18                          | 50                | 21                         | 0.90                          | 137                    | 1.41                          | 84                     |
|     | 137               | 1.41                          | 50                | 219                        | 1.18                          | 19                     | 1.53                          | 44                     |
| R15 | 119               | 2.95                          | 50                | <50                        | 2.72                          | <50                    | 3.13                          | 63                     |
| R16 | 138               | 1.92                          | 50                | <50                        | 1.69                          | <50                    | 1.96                          | 14                     |
| R20 | 104               | 3.19                          | 50                | <50                        | 3.10                          | <50                    | 3.39                          | 73                     |
|     | 319               | 5.03                          | 75                | <75                        | 4.82                          | <75                    | 5.25                          | 80                     |
| R22 | 145               | 6.92                          | 75                | <75                        | 6.71                          | <50                    | 7.00                          | 29                     |
| R23 | 15228             | 3.36                          | 50                | <50                        | 3.08                          | <50                    | 3.41                          | 18                     |
|     | 103               | 6.11                          | 75                | <75                        | 5.78                          | <75                    | 6.28                          | 62                     |
| R25 | 115               | 1.58                          | 500/50            | <500                       | 1.33                          | <50                    | 1.92                          | 124                    |
| R29 | 102               | 10.36                         | 40                | <40                        | 9.86                          | <40                    | 10.41                         | 18                     |
| R30 | 101               | 6.84                          | 50                | <50                        | 6.67                          | <50                    | 6.87                          | 11                     |
| R31 | 179               | 9.59                          | 50                | <50                        | 9.18                          | <50                    | 9.79                          | 73                     |

\*Limit of detection of the assay for plasma HIV-1 RNA used at the time of the blip.

†HIV-1 RNA measurement at visit prior to the blip.

‡HIV-1 RNA measurement at visit after to the blip.

**Table S4.** Decay of cells with inducible, replication-competent proviruses as measured by QVOA.

| Time on ART* (yrs) | Donors studied | Fraction of donors with outgrowth (%) | Total assays | Fraction of assays with outgrowth (%) | Positive assays                 |                        | All assays <sup>†</sup>         |                        |
|--------------------|----------------|---------------------------------------|--------------|---------------------------------------|---------------------------------|------------------------|---------------------------------|------------------------|
|                    |                |                                       |              |                                       | Geometric mean frequency (IUPM) | Mean time on ART (yrs) | Geometric mean frequency (IUPM) | Mean time on ART (yrs) |
| <7 <sup>‡</sup>    | 62             | 95.2                                  | 171          | 86.5                                  | 0.54                            | 3.1                    | 0.44                            | 3.0                    |
| >7                 | 42             | 90.4                                  | 61           | 88.5                                  | 0.62                            | 20.5                   | 0.46                            | 20.6                   |

\*Time from the start of a continuously suppressive ART regimen. Isolated blips were not considered an exclusion.

<sup>†</sup>For negative assays, the maximum value based on the number of cells plated was used.

<sup>‡</sup>Data from Siliciano et al., 2003 (reference 29).

**Table S5.** Models for decay of inducible, replication-competent HIV-1 with very long-term ART.

| Model                 | Model constraints*                         | Initial decay     |                   | $t_e$<br>(yrs) <sup>†</sup> | 2 <sup>nd</sup> phase <sup>‡</sup> |                                      | -LL <sup>§</sup> | BICc <sup>¶</sup> |
|-----------------------|--------------------------------------------|-------------------|-------------------|-----------------------------|------------------------------------|--------------------------------------|------------------|-------------------|
|                       |                                            | $t_{1/2}$<br>(mo) | 95% CI<br>(mo)    |                             | $t_2$<br>(yrs)                     | 95% CI in yrs<br>$t_2$ ( $t_{1/2}$ ) |                  |                   |
| simple exponential    |                                            | 89 yr             | 18 yr to $\infty$ |                             |                                    |                                      | 425              | 450               |
| segmented exponential |                                            | 21                | 12–110            | 2.9                         | 60                                 | 15 to $\infty$<br>(29 to $\infty$ )  | 410              | 451               |
|                       | initial $t_{1/2} = 44$ mo                  | 44                |                   | 3.1                         | 97                                 | 18 to $\infty$<br>(27 to $\infty$ )  | 414              | 450               |
|                       | $t_e = 7$ yr                               | 55                | 31–278            | 7                           | 20                                 | 8 to $\infty$<br>(41 to $\infty$ )   | 419              | 455               |
|                       | $t_e = 7$ yr,<br>initial $t_{1/2} = 44$ mo | 44                |                   | 7                           | 23                                 | 10 to $\infty$<br>(73 to $\infty$ )  | 419              | 449               |
| biexponential         |                                            | 6                 | 4–13              |                             | 28                                 | 12 to $\infty$<br>(69 to $\infty$ )  | 408              | 454               |

\*QVOA data in **Figure 3B** were modeled using simple exponential decay, segmented exponential decay, and biexponential decay (also **Figure S5**). If a model constraint is indicated, then the corresponding parameter was fixed and not fitted. The fit in **Figure 3B** corresponds to the selected model shown in the next to last row in the Table with the initial phase  $t_{1/2} = 44$  months, a breakpoint at 7 year and  $t_2 = 23$  years

<sup>†</sup>Time at which the decay rate changes.

<sup>‡</sup>After the initial decay for time  $t_e$ , the segmented models and the biexponential model estimated a slow increase in the levels of cells with inducible, replication-competent HIV-1. This rate of increase is expressed as a doubling time ( $t_2$ ). However, the 95% CI on the second phase is very wide and includes in all cases the possibility of a constant level or even a slow decrease. Thus, in the Table we include two rows which together represent the 95% CI for the second phase. The first row indicates the limits of the CI when the levels are increasing and the second row, in parentheses, the limits when the levels are decreasing. Thus, for our selected model shown in the next to last row in the Table with the initial phase  $t_{1/2} = 44$  months, a breakpoint at 7 year

and  $t_2 = 23$  years, the 95% CI of the second phase includes a doubling time from 10 years to infinity (i.e. no increase), and a half-life from 73 years to infinity (i.e. no decay).

§Log likelihood.

¶Bayesian information criterion corrected.

**Table S6.** Best fit models for decay of intact proviruses as measured by IPDA.

| Model                 | Model constraints* | Initial decay  |             | $t_e$ (yrs) | 2 <sup>nd</sup> phase <sup>†</sup> |              | -LL <sup>‡</sup> | BICc <sup>§</sup> |
|-----------------------|--------------------|----------------|-------------|-------------|------------------------------------|--------------|------------------|-------------------|
|                       |                    | $t_{1/2}$ (mo) | 95% CI (mo) |             | $t_{1/2}$ (yrs)                    | 95% CI (yrs) |                  |                   |
| simple exponential    |                    | 68             | 57-84       |             |                                    |              | 418              | 444               |
| segmented exponential | $t_e = 6$ yr       | 40             | 30-62       | 6           | 10                                 | 7-18         | 406              | 443               |
|                       | $t_e = 7$ yr       | 46             | 34-70       | 7           | 9                                  | 6-18         | 407              | 444               |
| biexponential         |                    | 12             | 6-17        |             | 10                                 | 6-17         | 413              | 459               |

\*IPDA data in **Figure 3C** were modeled using simple exponential decay, segmented exponential decay, and biexponential decay. The best fits were obtained with segmented exponential decays. We varied the time at which the decay rate changed ( $t_e$ ), from 2 to 12, and got the best fits with  $t_e = 6$  or 7 yrs. The fit in **Figure 3C** corresponds to the next to last row in the Table with the initial phase  $t_{1/2} = 46$  months, a breakpoint at 7 year and a second phase  $t_{1/2} = 9$  years.

<sup>†</sup>After the initial decay, the best fit models all showed a second phase with a slower decay rate.

<sup>‡</sup>Log likelihood.

<sup>§</sup>Bayesian information criterion corrected.



**Table S7.** Best fit models for decay of defective proviruses as measured by IPDA.

| Provirus type | Model*                       | Model constraints | Initial decay   |                                     | $t_e$ (yrs) | 2 <sup>nd</sup> phase |                                      | -LL‡ | BICc§ |
|---------------|------------------------------|-------------------|-----------------|-------------------------------------|-------------|-----------------------|--------------------------------------|------|-------|
|               |                              |                   | $t_{1/2}$ (yrs) | 95% CI (yrs)                        |             | $t_{1/2}$ (yrs)       | 95% CI (yrs)                         |      |       |
| 3'del/HM      | <i>simple exponential</i>    |                   | 6               | 14-26                               |             |                       |                                      | 228  | 257   |
|               | <i>segmented exponential</i> | $t_e = 9$ yr      | 16              | 11-34                               | 9           | 42                    | 17 to $\infty$<br>(81 to $\infty$ )  | 221  | 257   |
|               | <i>biexponential</i>         |                   | 8               | 5-23                                |             | 20                    | 11 to $\infty$<br>(65 to $\infty$ )  | 268  | 312   |
| 5'del/HM      | <i>simple exponential</i>    | NA                | 25              | 16-18                               | NA          | NA                    | NA                                   | 302  | 328   |
|               | <i>segmented exponential</i> | $t_e = 9$ yr      | 38              | 14 to $\infty$<br>(49 to $\infty$ ) | 9           | 27                    | 12 to $\infty$<br>(124 to $\infty$ ) | 302  | 338   |
|               | <i>biexponential</i>         |                   | 20              | 2 to $\infty$<br>(3 to $\infty$ )   |             | 35                    | 12 to $\infty$<br>(43 to $\infty$ )  | 337  | 384   |

\*IPDA data in **Figure 2D** were modeled using simple exponential decay, segmented exponential decay, and biexponential decay. The best fits were obtained with segmented exponential decay for 3'del/HM (3' deleted/hypermutated) proviruses and linear decay for 5'del (5' deleted) proviruses. Entries in red refer to doubling times and corresponding limits of the confidence intervals. When the upper bound is infinite, it implies no increase or decrease.

‡Log likelihood.

§Bayesian information criterion corrected.
